# Supplementary material
Source: PubMed Central journal article supplement (PMC3603517)
Supplement: supp_126.1.221_JCS113415.pdf [file supp_126.1.221_JCS113415.pdf]

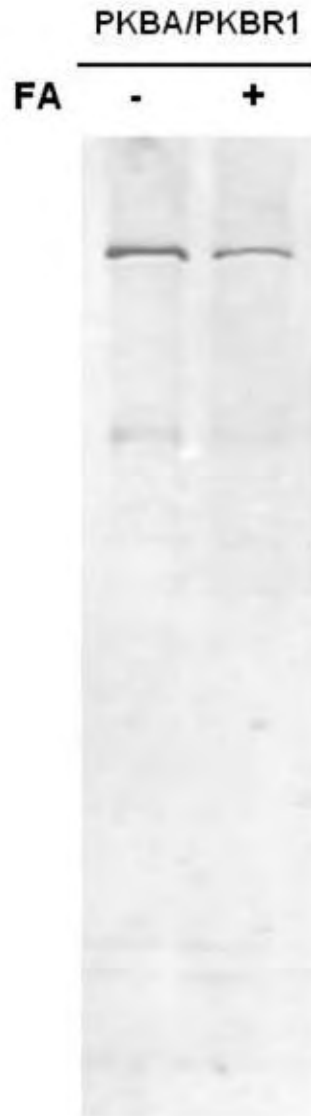

**Fig. S1. PKBA/PKBR1 double null cells do not phosphorylate PKB substrates in response to uniform FA stimulation.** PKBA/PKBR1 double null vegetative cells were grown on bacterial lawns overnight, washed and stimulated with 50  $\mu$ M FA.  $4 \times 10^4$  cells were loaded per well on an SDS-PAGE gel. Western blot was probed for phospho-PKB substrates. PKB substrates were not phosphorylated upon FA stimulation. These results demonstrate the specificity of the anti-phospho-PKB substrate antibody (Fig. 4C).

## A Ras CG null cAMP chemotaxis

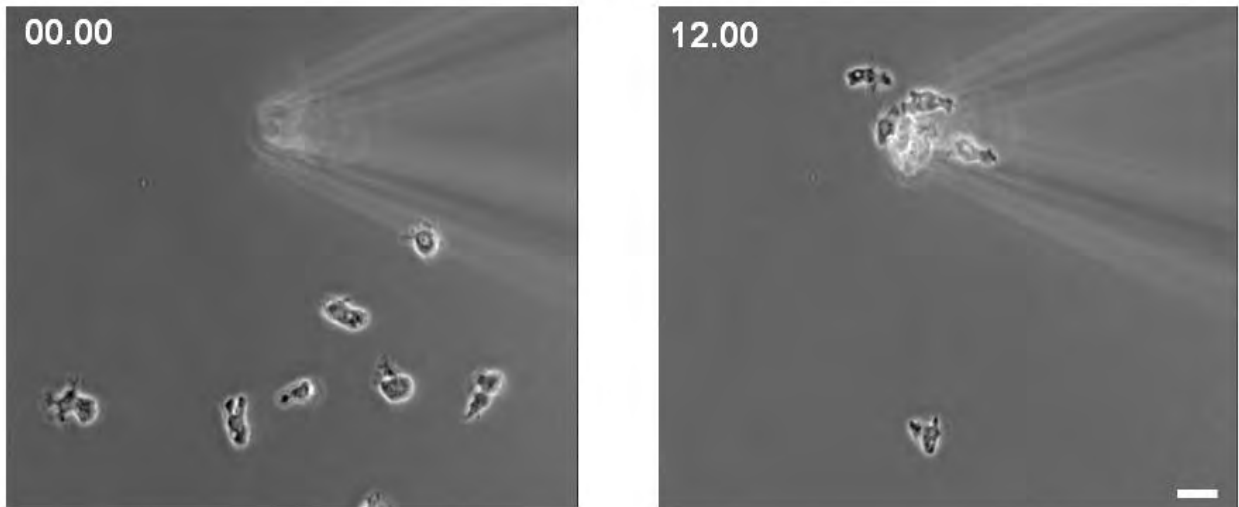

## B PKBA/PKBR1 null FA chemotaxis

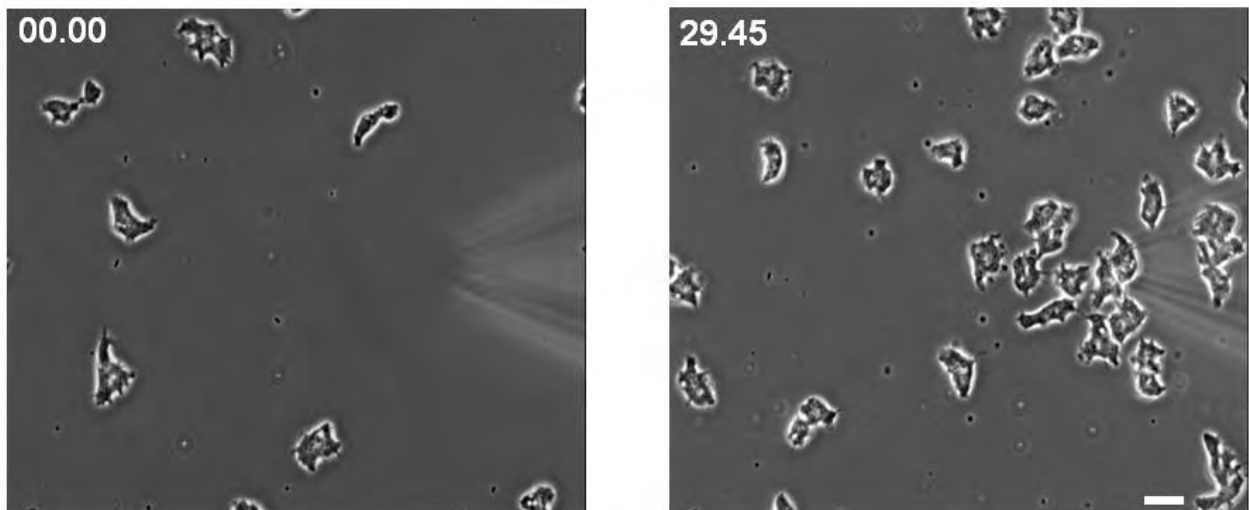

**Fig. S2. Chemotaxis of Ras CG and PKBA/PKBR1 null cells.** (A) Frames of Ras CG null cells at indicated time points in a cAMP gradient. Cells migrate up the concentration gradient and towards the camp-loaded micropipette. (B) Frames of PKBA/PKBR1 null cells at indicated time points in a FA gradient. Cells migrate up the concentration gradient and towards the FA-loaded micropipette. Scale bar: ~10  $\mu\text{m}$ .

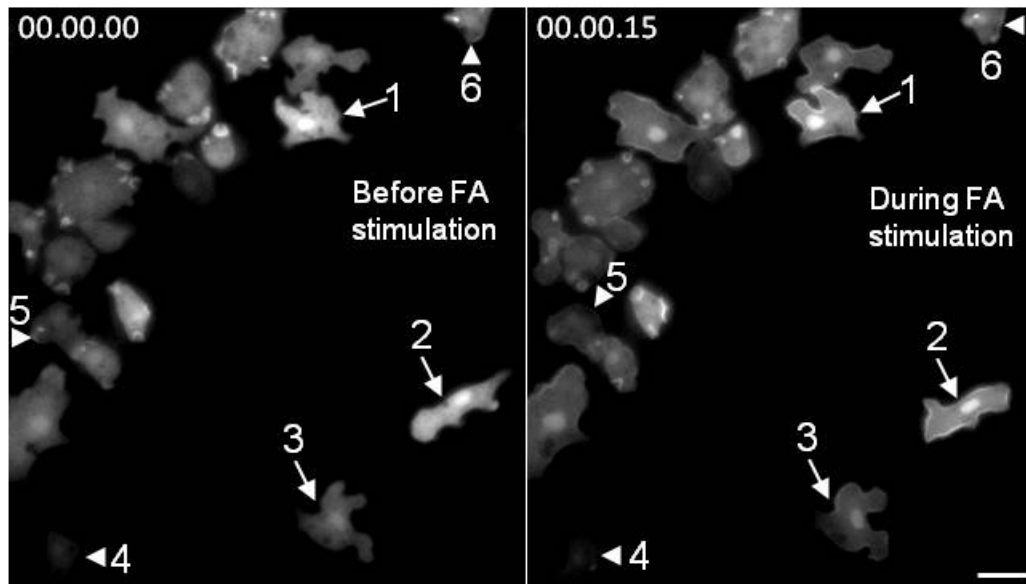

**Fig. S3. Response of 4-hour-starved  $PH_{Crac}$ -GFP/WT cells to cAMP.** Four-hour-starved cells contain mixed population of semi-polarized (arrow, 1-3) and unpolarized cells (arrowhead, 4-6), (left panel). During uniform cAMP stimulation  $PH_{Crac}$ -GFP translocated to membrane in both semi and unpolarized cells (right panel).

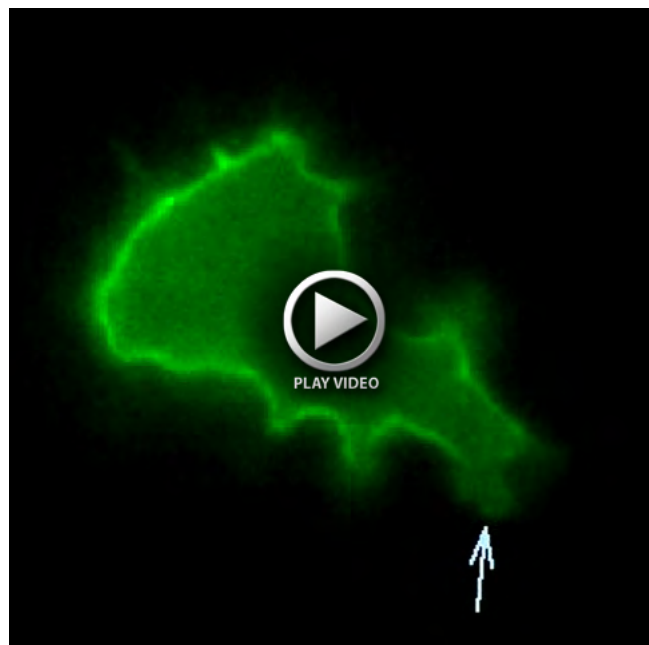

**Movie 1. Random migration of a PTEN-GFP/PLC null cell.** Time-lapse movie of PTEN-GFP expressed in PLC null cells was captured for 28.5 seconds with interval of 1.5 seconds. Arrow indicates absence of PTEN-GFP on the periphery of pseudopods.

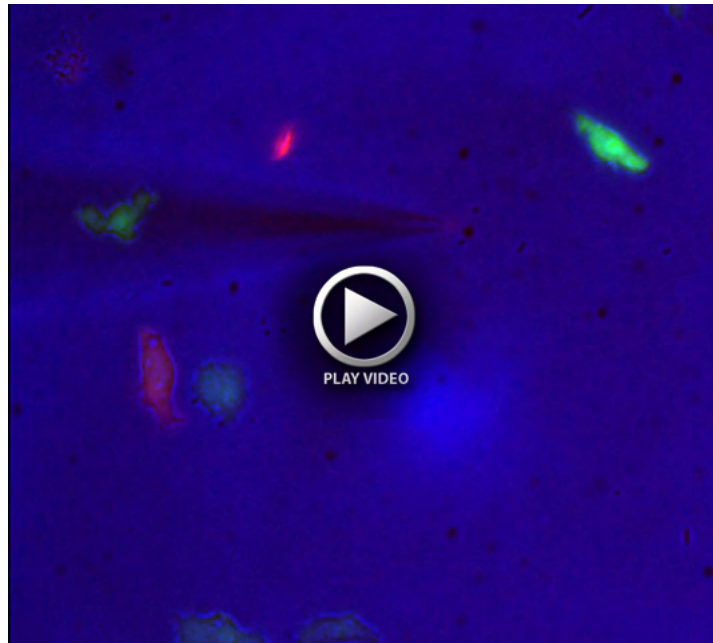

**Movie 2. Unpolarized cells switch directions while polarized cells do U-turns when gradients are reversed.** Time-lapse movie of polarized and unpolarized cells migrating towards a micropipette filled with both FA and cAMP. Unpolarized cells are only expressing  $\text{PH}_{Crac}$ -GFP and are green. Polarized cells starved for 6 hours are expressing  $\text{PH}_{Crac}$ -GFP and LimE-RFP and are orange in color. Polarized cells make a U-turn while unpolarized cells can quickly switch directions when micropipette is moved.

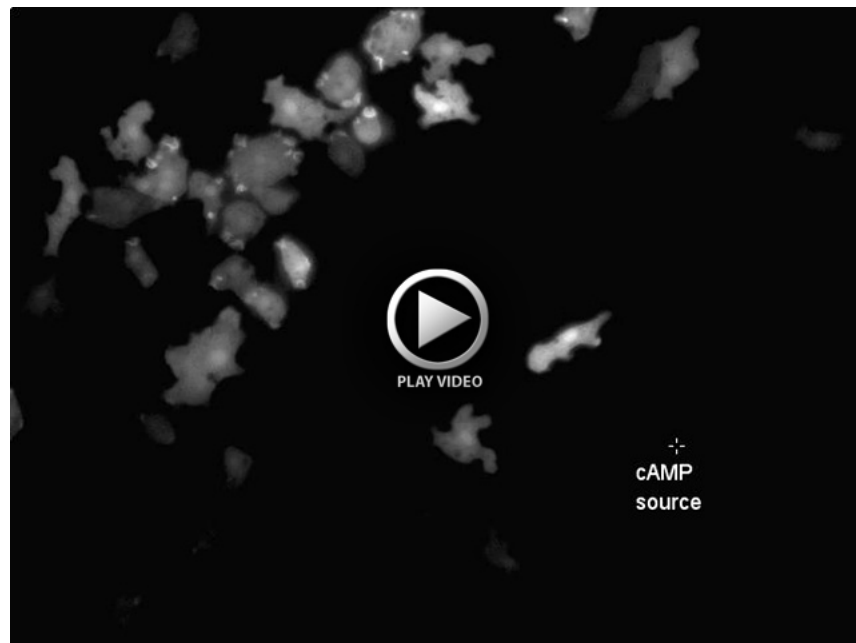

**Movie 3. Semi-polarized and unpolarized cells respond to cAMP.** Frames of 4-hour-starved wild type cells expressing  $\text{PH}_{Crac}$ -GFP were captured every 15 seconds as the cells migrated towards a cAMP-filled micropipette. A mixed population of semi-polarized (arrow, cells 1-3) and unpolarized cells (arrow head, cells 4-6) were observed prior to and during migration. When the cAMP filled micropipette was brought down, a uniform translocation of  $\text{PH}_{Crac}$ -GFP to the membrane was observed (frame 2). Both semi-polarized and unpolarized cells migrate towards the cAMP filled micropipette.

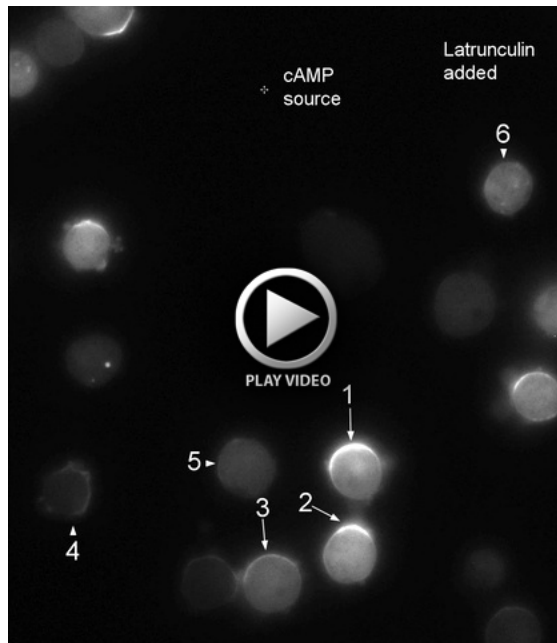

**Movie 4. Unpolarized cells do not form a stable  $PH_{Crac}$ -GFP crescent in a cAMP gradient.** Frames of the same 4-hour-starved wild-type cells expressing  $PH_{Crac}$ -GFP in the presence of Latrunculin-A were captured every 15 seconds 72 minutes later. The camp-loaded micropipette was moved to a 2<sup>nd</sup> position, and again, the semi-polarized cells (labeled 1-3) formed  $PH_{Crac}$ -GFP crescents toward the side of the new cAMP source while unpolarized cells (labeled 4-6) made unstable  $PH_{Crac}$ -GFP crescents and in some instances were able to extend pseudopods since these cells are more resistant to the Latrunculin-A treatment. Latrunculin for immobilization as compared to cells that are semi-polarized.

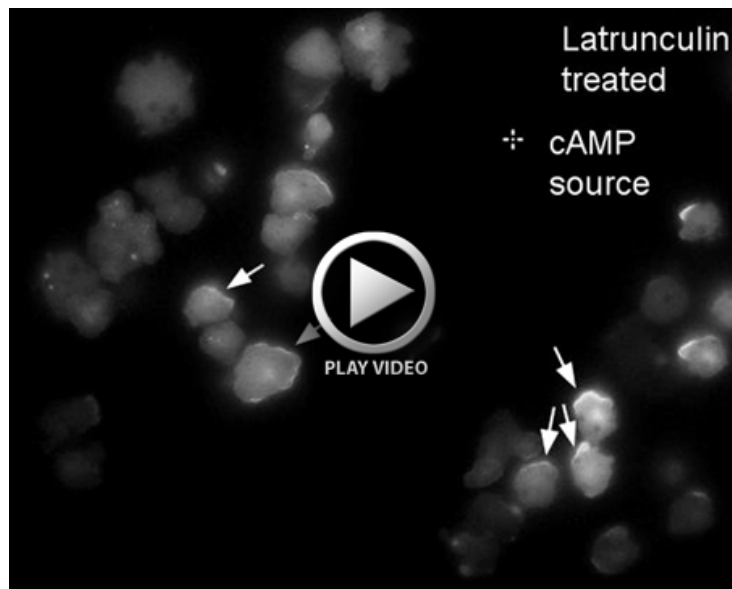

**Movie 5. Latrunculin-treated unpolarized cells migrate to cAMP source while polarized cells are immobilized.** Time-lapse movie of latrunculin-treated unpolarized and semi-polarized cells. Arrow indicates semi-polarized cells that are still immobilized after 30 minutes of latrunculin treatment and making crescent towards cAMP source. Unpolarized cells, on the other hand, begin to resume motility towards the cAMP source as the latrunculin presumably degrades, and levels drop. Unpolarized cells require higher levels of latrunculin for immobilization as compared to cells that are semi-polarized.
